# Supplementary material for: A Simple and Effective Phosphine-Doping Technique for Solution-Processed Nanocrystal Solar Cells
Source: MDPI journal article supplement (doi:10.3390/nano13111766), 2023-05-30

# Supplementary Materials

Chenbo Min <sup>1</sup>, Yihui Chen <sup>1</sup>, Yonglin Yang <sup>1</sup>, Hongzhao Wu <sup>1</sup>, Bailin Guo <sup>1</sup>, Sirui Wu <sup>1</sup>, Qichuan Huang <sup>1</sup> and Donghuan Qin <sup>1,2,\*</sup> and Lintao Hou <sup>3</sup>

**Table S1.** Summarized XPS values of different elements for two types of films

| CdTe                     | C 1s   | Cd 3d  | O 1s   | Te 3d  | P 2p   |
|--------------------------|--------|--------|--------|--------|--------|
| BE (eV)                  | 281.90 | 401.96 | 527.20 | 572.80 | 129.50 |
| Atomic concentration (%) | 36.8   | 17.7   | 32.6   | 12.4   | 0.4    |

---

| CdTe with TPP (5000ppm)  | C 1s   | Cd 3d  | O 1s   | Te 3d  | P 2p   |
|--------------------------|--------|--------|--------|--------|--------|
| BE (eV)                  | 281.70 | 401.96 | 527.20 | 572.90 | 135.50 |
| Atomic concentration (%) | 43.3   | 17.5   | 25.5   | 10.2   | 3.6    |

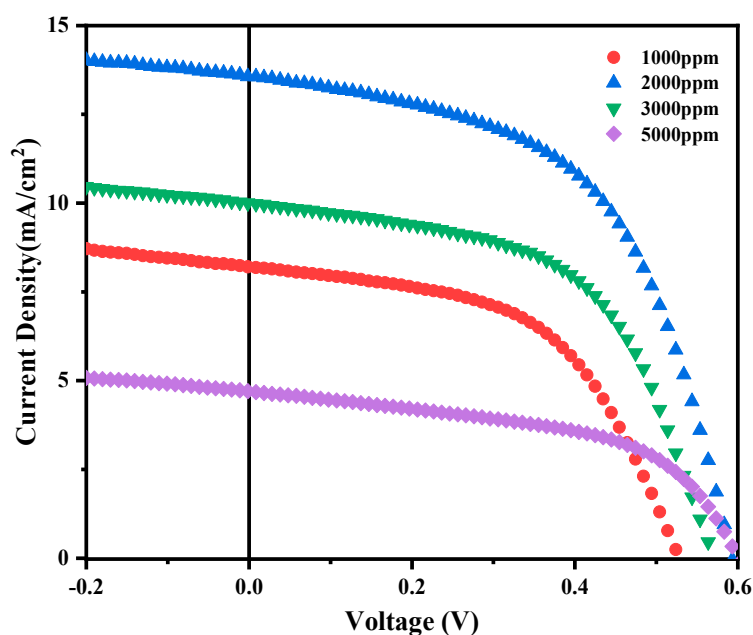

**Figure S1.**  $J$ - $V$  curves of ITO/ZnO/CdSe/CdTe/TPP/Au with different doping concentration.

**Table S2.** Summarized performance of NC solar cells with different doping concentration. (Figure S1).

| Doping (ppm) | $V_{oc}$ (V) | $J_{sc}$ (mA/cm <sup>2</sup> ) | FF (%) | PCE (%) | $R_s$ ( $\Omega \cdot \text{cm}^2$ ) | $R_{sh}$ ( $\Omega \cdot \text{cm}^2$ ) |
|--------------|--------------|--------------------------------|--------|---------|--------------------------------------|-----------------------------------------|
| 1000         | 0.52         | 8.21                           | 53.78  | 2.31    | 19.12                                | 351.14                                  |
| 2000         | 0.59         | 13.55                          | 54.43  | 4.38    | 9.91                                 | 377.52                                  |
| 3000         | 0.57         | 10.00                          | 55.11  | 3.16    | 15.24                                | 435.86                                  |
| 5000         | 0.60         | 4.70                           | 52.41  | 1.49    | 21.27                                | 382.16                                  |

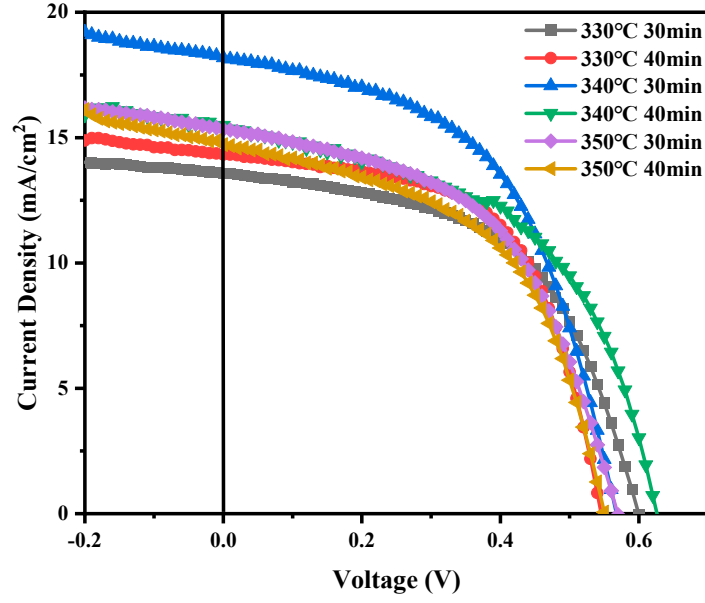

**Figure S2.**  $J$ - $V$  curves of ITO/ZnO/CdSe/CdTe/TPP/Au with different temperature and annealing time.

**Table S3.** Summarized performance of NC solar cells with different heated time and temperature (Figure S2).

| Device        | $V_{oc}$<br>(V) | $J_{sc}$<br>(mA/cm <sup>2</sup> ) | FF<br>(%) | PCE<br>(%) | $R_s$<br>( $\Omega \cdot \text{cm}^2$ ) | $R_{sh}$<br>( $\Omega \cdot \text{cm}^2$ ) |
|---------------|-----------------|-----------------------------------|-----------|------------|-----------------------------------------|--------------------------------------------|
| 330°C / 30min | 0.59            | 13.55                             | 54.43     | 4.38       | 9.91                                    | 377.52                                     |
| 330°C / 40min | 0.54            | 14.32                             | 59.53     | 4.61       | 7.36                                    | 353.02                                     |
| 340°C / 30min | 0.56            | 18.19                             | 53.16     | 5.41       | 8.14                                    | 182.87                                     |
| 340°C / 40min | 0.62            | 15.49                             | 51.73     | 4.97       | 8.30                                    | 208.86                                     |
| 350°C / 30min | 0.56            | 15.33                             | 52.59     | 4.52       | 10.59                                   | 205.06                                     |
| 350°C / 40min | 0.55            | 14.72                             | 52.51     | 4.23       | 8.58                                    | 156.24                                     |

**Figure S3.** transient photovoltage (TPV) measurements of CdTe NC solar cells with different doping concentration.

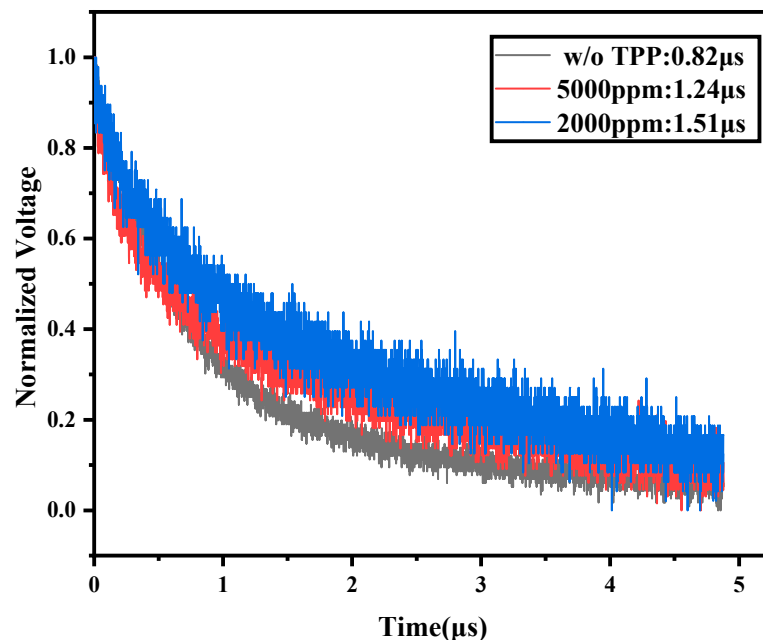

Supplement: s1 [file s1]
